# Supplementary material
Source: PubMed Central journal article supplement (PMC3429702)
Supplement: NIHMS391096-supplement-Supp_Fig_S1-S4___Supp_Table_S1-S2.pdf [file NIHMS391096-supplement-Supp_Fig_S1-S4___Supp_Table_S1-S2.pdf]

**Supplemental Table S1. Primers for all the constructs**

|                                             |                        |                                                                             |
|---------------------------------------------|------------------------|-----------------------------------------------------------------------------|
| Wildtype                                    | NewE-5'                | <u>GGGCCATGG</u> <sub>gc</sub> GTTTCGTTGGACCCTGTGGGACACCCTGGCTTTCCTGCTGCTGC |
|                                             | NewE-Rev1              | GGGATGAACATGATCAGCAGAGACGGCAGCAGCAGAGACAGCAGCAGCAGGAAA<br>GCCAG             |
|                                             | NewE-Fwd2              | CTGCTGATCATGTTTCATCCCGTCTACCTTCAAACGTCCGGTTTCTTCTTGAAAGC                    |
|                                             | NewE-Rev2              | CAGAAGAAGCCATCAGCAGGGTTTTACGCAGGTTTCAGAGCTTTCCAAGAAGAAAC<br>CGG             |
|                                             | NewE-Fwd3              | CCTGCTGATGGCTTCTTCTGTTCTGCTGAAACCGCTGAACTGCTCTCGTCTGCCGTG                   |
|                                             | NewE-Rev3              | GTCAGCAGGAAGGTCAGGGTTTCTGAGCGTAAACGCACGGCAGACGAGAGCAG                       |
|                                             | NewE-Fwd4              | CCCTGACCTTCTGCTGACCCAGAAAAAACCTGCGTTAAAAACTACGTTCTGTAAA<br>G                |
|                                             | NewE-3'                | <u>GGGGCGGCCGC</u> ATTAGTGATGGTGATGGTGATGTTCTTTACGAACGTAGTTTTTAA<br>CGC     |
| E-LS, E-L <sub>N</sub> , & E-L <sub>C</sub> | E-LS-5'                | <u>GGTGTGCCATGG</u> <sub>gt</sub> GTTTCG                                    |
|                                             | E-LS-Rev1              | AGCAGCAGCAGCAGCAGCAGAGTGTCCACAGGGTCCAACGAACACCCATGGCAC                      |
|                                             | E-LS-Fwd2              | TGCTGCTGCTGCTGCTCTCTCTCTGCTGCCATCTCTGCTCCTCCTGCTCCTGCC                      |
|                                             | E-LS-Rev2              | GCGCTTTCCAAGAAGAAACCGGACGTTTGAAGGTAGAAGGCAGGAGCAGGAGGAG                     |
|                                             | E-LS-Fwd3              | GGTTTCTTCTTGAAAGCGCTGAACCTCCGTAAAACGCTGCTCATGGCGAGTCT                       |
|                                             | E-LS-Rev3              | CACGGCAGACGAGAGCAATTCAGCGGTTTCAGACGAACAGAGCTCGCCATGAGCA                     |
|                                             | E-LS-Fwd4              | TGCTCTGCTGCTGCTGCTGCTTACGCGCAGGAAACCCTGACCTTCTCCTCACCC                      |
|                                             | E-LS-Rev4              | CTTTACGAACGTAGTTTTTAAACGCAGGTTTTTTTCTGGGTGAGGAGGAAGGTCAG                    |
|                                             | E-LS-Fwd5              | GCGTTAAAAACTACGTTTCGTAAAGAACACCATCATCACCACCCTCGAGCACAC                      |
|                                             | E-LS-3'                | <u>GGTGTGCTCGAGG</u> TGGTGG                                                 |
|                                             | E-L <sub>N</sub> -Rev1 | TGCTGCTGCTGCTGCTCTCTCTCTGCTGCCATCTCTGCTCATCATGTTTCATCCC                     |
|                                             | E-L <sub>N</sub> -Fwd2 | GCGCTTTCCAAGAAGAAACCGGACGTTTGAAGGTAGAAGGGATGAACATGATGAG<br>CAG              |
|                                             | E-L <sub>C</sub> -Fwd2 | AGCAGCAGCAGGAAAGCCAGAGTGTCCACAGGGTCCAACGAACACCCATGGCAC                      |
|                                             | E-L <sub>C</sub> -Rev2 | GGCTTTCCTGCTGCTGCTCTCTCTCTGCTGCCATCTCTGCTCCTCCTGCTCCTGCC                    |
|                                             | E <sub>25-28</sub>     | E-Fwd                                                                       |
| E28lyso-Rev                                 |                        | GTTTCATACCGCTACCGCTGCCGATGAACATGATCAGCAGAGACGGC                             |
| E27lyso-Rev                                 |                        | GTTTCATACCGCTACCGCTGCCGAACATGATCAGCAGAGACGGCAG                              |
| E26lyso-Rev                                 |                        | GTTTCATACCGCTACCGCTGCCATGATCAGCAGAGACGGCAGAAAC                              |
| E25lyso-Rev                                 |                        | GTTTCATACCGCTACCGCTGCCGATCAGCAGAGACGGCAGAAACAG                              |
| Lyso-Fwd                                    |                        | GGCAGCGGTAGCGGTATGAACATCTTCGAAATGCTCCGTATCGAC                               |
| Lyso-Rev                                    |                        | <u>GGTGTGGCGGCCGC</u> ATTAGTGATGGTGATGGTGATGCAGGTTTTTGTACGCGTCCC<br>AGG     |
| N-terminal deletion                         | E <sub>N9</sub> -Fwd   | <u>GGTGTGCCATGG</u> <sub>ga</sub> CTGGCTTTCCTGCTGCTGCTGTC                   |
|                                             | E <sub>N10</sub> -Fwd  | <u>GGTGTGCCATGG</u> <sub>ga</sub> GCTTTCCTGCTGCTGCTGCTGCTGTC                |
|                                             | E <sub>N11</sub> -Fwd  | <u>GGTGTGCCATGG</u> <sub>ga</sub> TTCCTGCTGCTGCTGCTGCTGCTGTC                |
|                                             | E <sub>N26</sub> -Fwd  | <u>GGTGTGCCATGG</u> <sub>ga</sub> TTCATCCCGTCTACCTTCAAACGTCC                |
|                                             | E-Rev                  | <u>GGTGTGGCGGCCGC</u> ATTAGTGATGGTGATG                                      |

\*Restriction sites are indicated with underline. Nucleotides added to introduce Gly residue at the position 2 are in lower case.

### Supplemental Figure 1

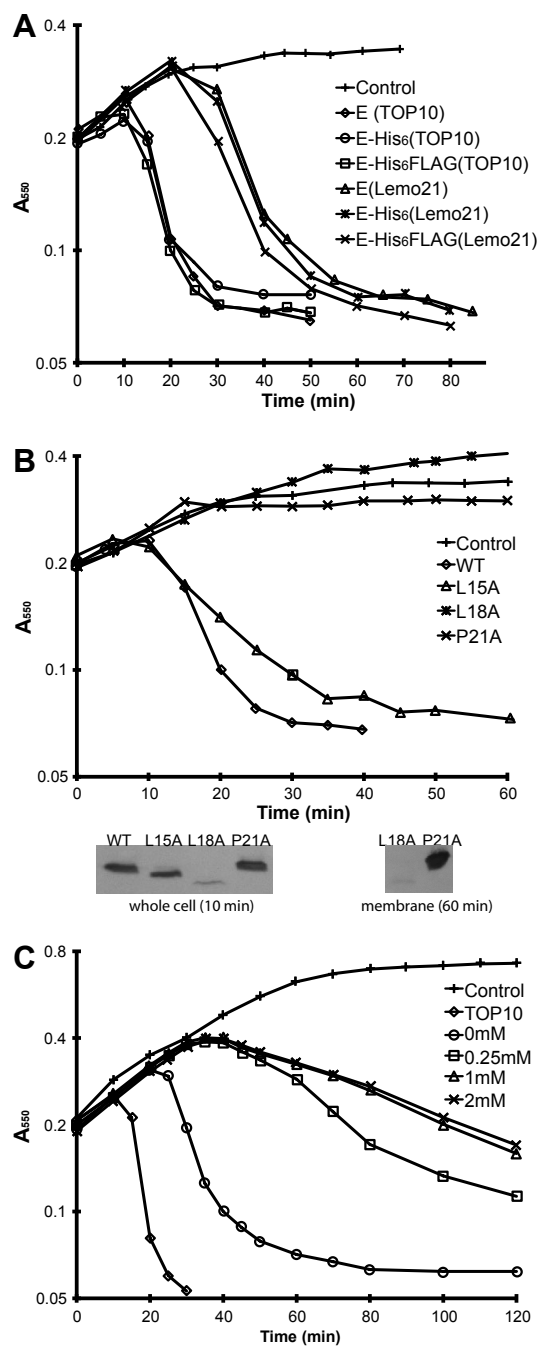

**Fig. S1.** Effect of the His6-tag and FLAG-tag on E, alanine-scanning in TOP10, and the effect of various L-rhamnose concentrations in lysis onset.

A. Growth curve comparison of wild-type E with His6-tagged or His6-FLAG tagged E.

B. Representative growth curves of alanine-scanning mutants in TOP10 cells. Expression of each E construct was induced at time= 0. Western blot of whole cells after 10 min of induction and E in membrane fractions after 60 min of induction.

C. Growth curves of wild-type in TOP10 and Lemo21 with different concentrations of L-rhamnose.

## Supplemental Figure 2

---WT —Average

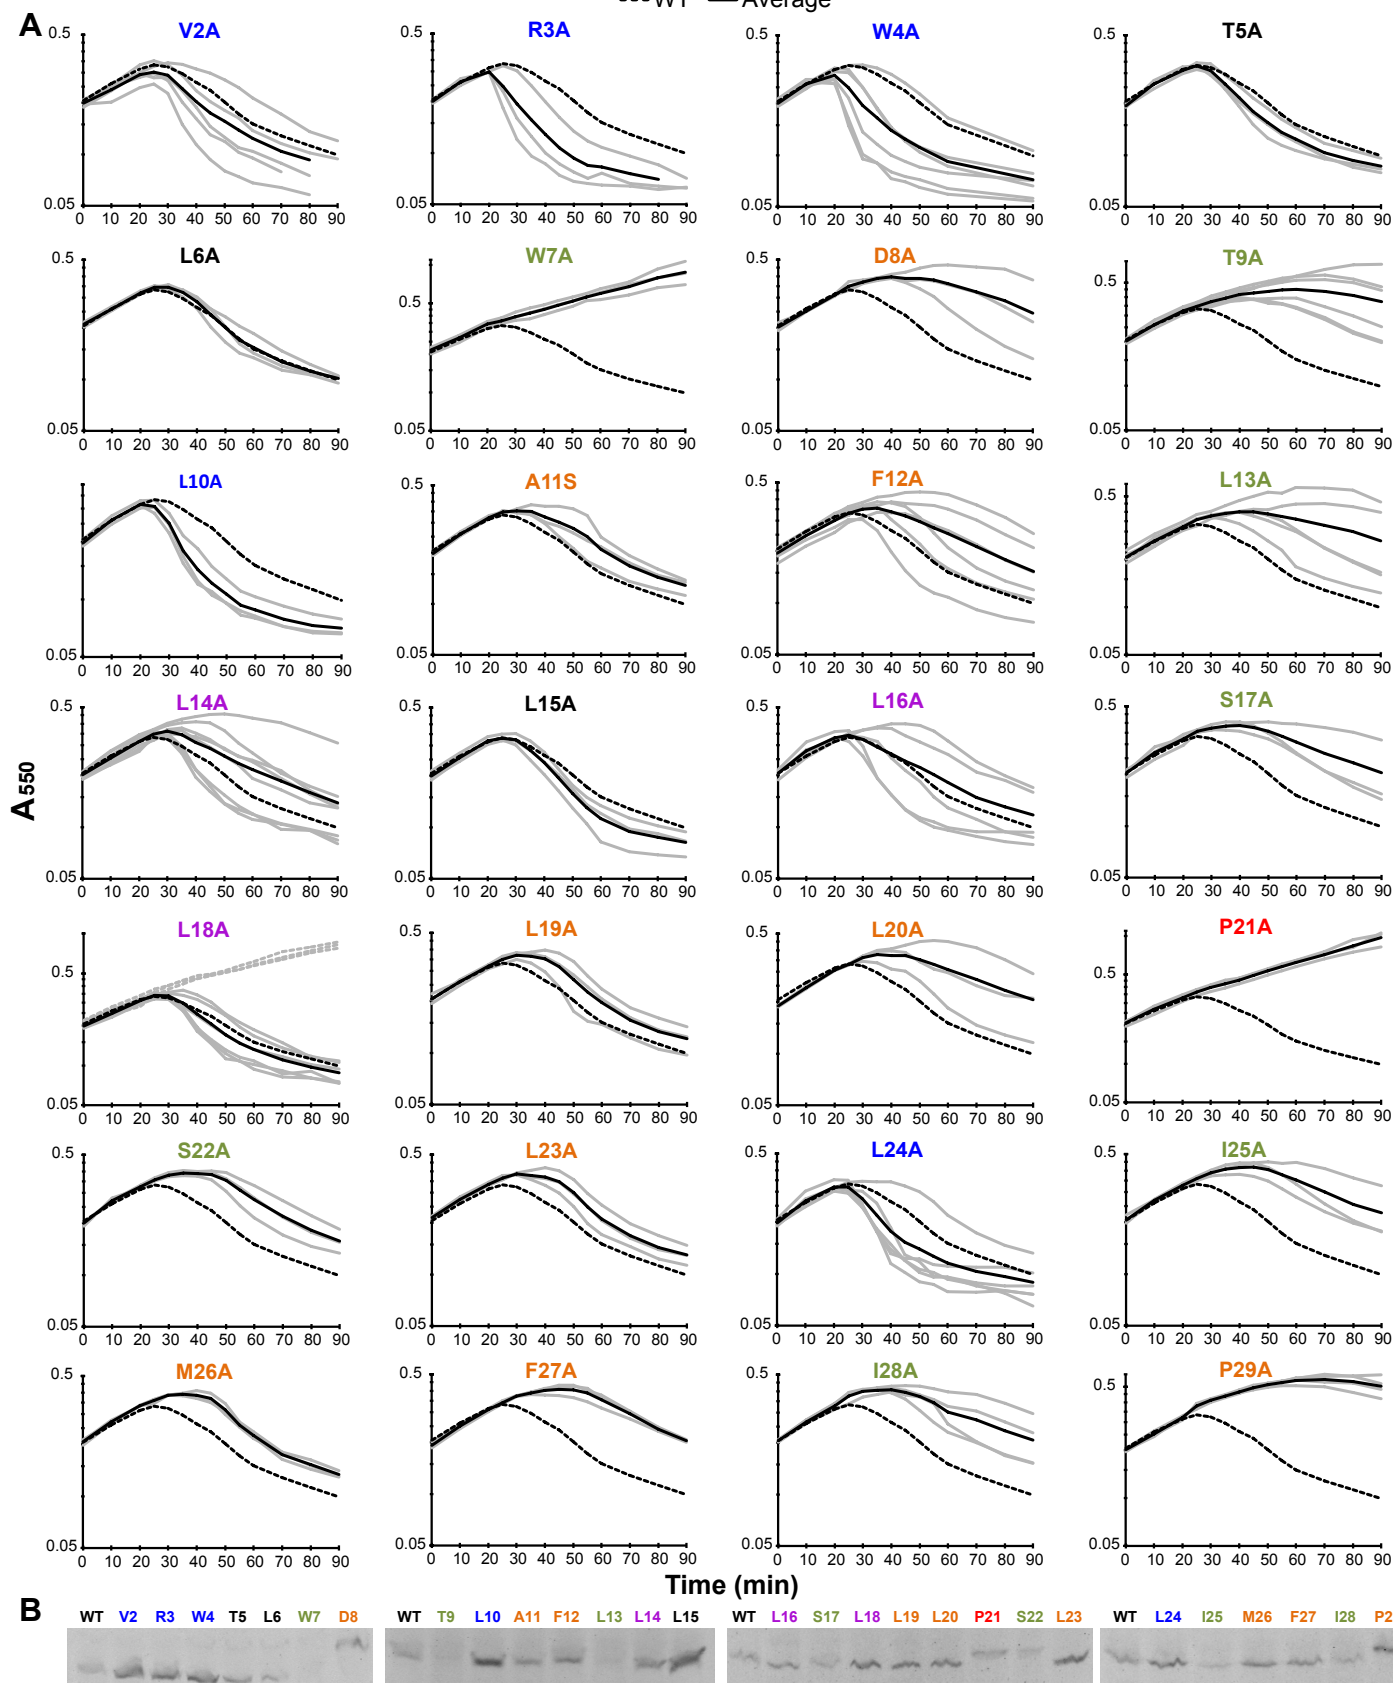

**Fig. S2.** Alanine-scanning in Lemo21.

A. Raw data of lysis assays of alanine-scanning mutants in Lemo21 cells. At least three replicates growth curves of each mutant were monitored by OD550(grey lines). Average growth curve are shown as solid black lines. For comparison, the averaged wild-type growth curve is shown as a dotted line. Each mutation is categorized by color as in Fig. 2.

B. Western blot of protein levels in whole cells after 20 min of induction.

### Supplemental Figure 3

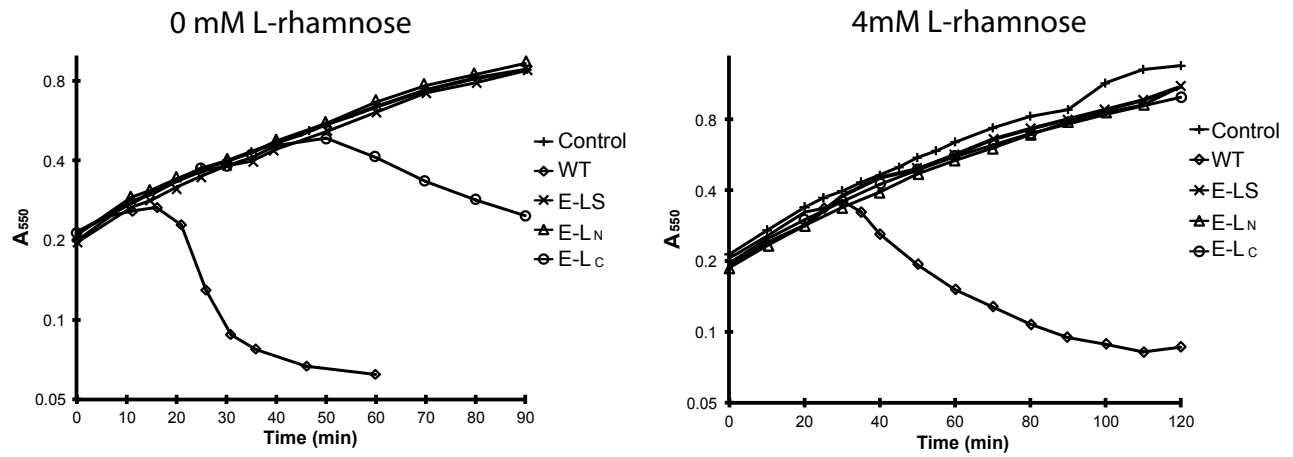

**Fig. S3.** Growth curves of leucine mutants in Lemo21. Cultures grown with 0 mM L-rhamnose (left) or 2 mM L-rhamnose (right).

### Supplemental Figure 4

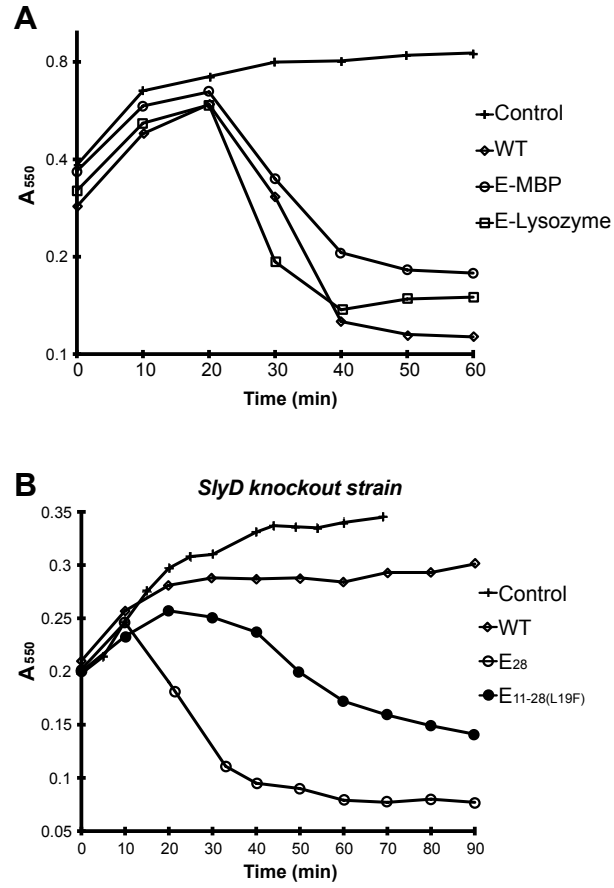

**Fig. S4.** A. Growth curves of E-MBP and E-lysozyme fusion constructs. B. Growth curve of E28 and E11-28(L19F) in the *SlyD* knockout strain.

**Supplemental Table S2. Predicted apparent free energy difference for insertion of the Phe mutants**

| Mutants                  | Sequence of TM         | Predicted $\Delta G$ |
|--------------------------|------------------------|----------------------|
| E <sub>11-28</sub>       | MGAFLLLSLLLPSLLIMFI    | -1.470               |
| E <sub>11-28(L13F)</sub> | MGAFFLLLSLLLPSLLIMFI   | -1.351               |
| E <sub>11-28(L14F)</sub> | MGAFLFLLSLLLPSLLIMFI   | -1.303               |
| E <sub>11-28(L15F)</sub> | MGAFLLFLSLLLPSLLIMFI   | -1.343               |
| E <sub>11-28(L16F)</sub> | MGAFLLLFLLSLLLPSLLIMFI | -1.368               |
| E <sub>11-28(L18F)</sub> | MGAFLLLSFLLPSLLIMFI    | -1.297               |
| E <sub>11-28(L19F)</sub> | MGAFLLLSLFLPSLLIMFI    | -1.359               |
| E <sub>11-28(L19I)</sub> | MGAFLLLSLILPSLLIMFI    | -1.502               |
| E <sub>11-28(L20F)</sub> | MGAFLLLSLLFPSLLIMFI    | -1.347               |
| E <sub>11-28(L23F)</sub> | MGAFLLLSLLLPSFLIMFI    | -1.378               |
| E <sub>11-28(L24F)</sub> | MGAFLLLSLLLPSLFIMFI    | -1.338               |

\* Values for predicted  $\Delta G$  were calculated using the prediction of  $\Delta G$  for TM helix insertion website at <http://dgpred.cbr.su.se/index.php?p=TMpred>.
